# Supplementary material for: A cofactor-induced repressive type of transcription factor condensation can be induced by synthetic peptides to suppress tumorigenesis
Source: PubMed Central journal article supplement (PMC11574045; doi:10.1038/s44318-024-00257-4), 2024-10-02
Supplement: 44318_2024_257_MOESM1_ESM.pdf [file 44318_2024_257_MOESM1_ESM.pdf]

## Appendix

| <b>Contents</b>    | <b>Pages</b> |
|--------------------|--------------|
| Appendix Figure S1 | 2-3          |
| Appendix Figure S2 | 4-5          |
| Appendix Figure S3 | 6            |
| Appendix Figure S4 | 7-8          |
| Appendix Figure S5 | 9-10         |
| Appendix Figure S6 | 11-12        |
| Appendix Figure S7 | 13           |
| Appendix Figure S8 | 14           |
| Appendix Table S1  | 15           |

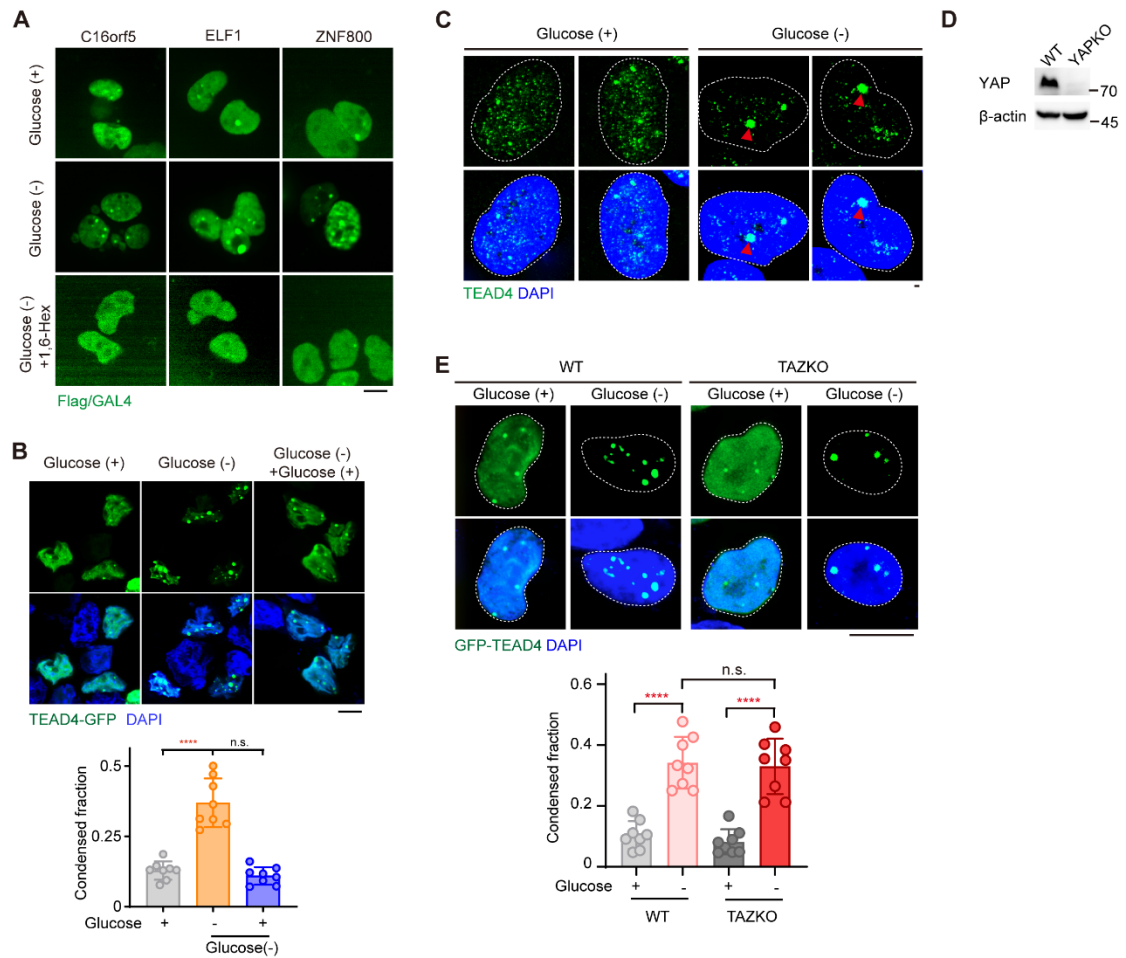

## Appendix Figure S1. Glucose Deprivation Induces Formation of TF Condensates

**A.** Representative images of TF condensates in HEK293FT cells transfected with the indicated Flag- or Gal4-tagged plasmids. Scale bar, 10  $\mu$ m. **B.** Fluorescence images of GFP-TEAD4 condensates in glucose starvation-treated HEK293FT cells with or without glucose supplement (upper), and quantification of TEAD4 condensed fraction (lower). The data were analyzed using one-way ANOVA, followed by the Tukey's post-hoc test. n.s., no significance; \*\*\*\*,  $p < 0.0001$ . Scale bar, 10  $\mu$ m. **C.** Fluorescence images of GFP-TEAD4 condensates in HGC-27 cells with or without their being subjected to glucose starvation. Scale bar, 1  $\mu$ m. **D.** Immunoblotting showing YAP protein levels in wild-type (WT) and YAPKO cells. **E.** Fluorescence images of GFP-TEAD4 condensates in wild-type (WT) and TAZ-knockout (TAZKO) cells with or without their being subjected to glucose deprivation for 12 h (upper), and quantification of TEAD4 condensed fraction (bottom). The data were analyzed using one-way ANOVA,

followed by the Tukey's post-hoc test. n.s., no significance; \*\*\*\*,  $p < 0.0001$ . Scale bar, 10  $\mu\text{m}$ .

Related to **Figure 1**.

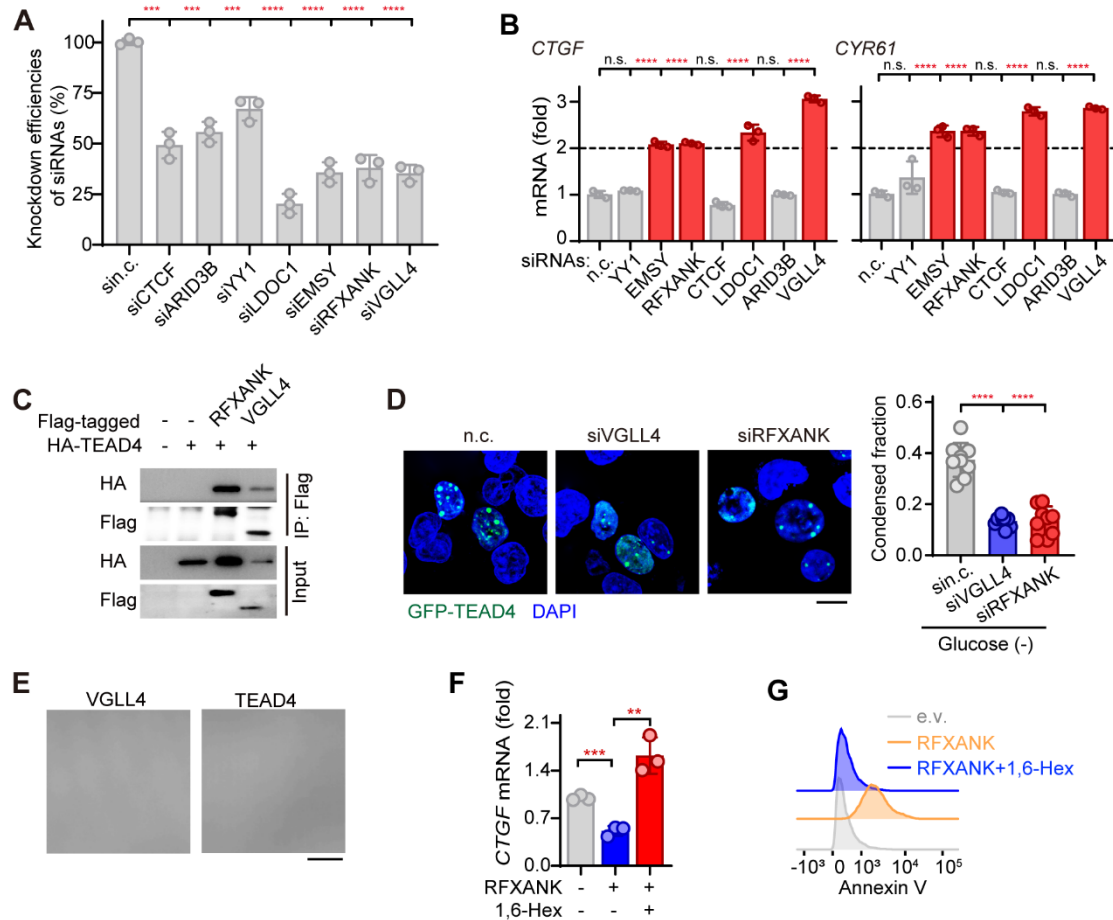

### Appendix Figure S2. VGLL4 and RFXANK as TEAD4 Phase Separation Inducers

**A.** Realtime-PCR (RT-PCR) analysis of the seven indicated siRNAs knockdown efficiencies in HGC-27 cells using *ACTB* as an internal control ( $n = 3/\text{group}$ ). The data were analyzed using one-way ANOVA, followed by the Tukey's post-hoc test. \*\*\*,  $p < 0.001$ ; \*\*\*\*,  $p < 0.0001$ . **B.** mRNA levels of *CTGF* and *CYR61* in HGC-27 cells transfected with the indicated siRNAs ( $n = 3/\text{group}$ ). The cutoff value was  $>2$  fold in mRNA change. The data were analyzed using one-way ANOVA, followed by the Tukey's post-hoc test. n.s., no significance; \*\*\*\*,  $p < 0.0001$ . **C.** Co-immunoprecipitation (co-IP) analysis of the interaction between TEAD4 and RFXANK or VGLL4 in HEK293FT cells. **D.** Fluorescence images of GFP-TEAD4 condensates in VGLL4- or RFXANK-knockdown cells upon their being subjected to glucose starvation (left), and quantification of TEAD4 condensed fraction (right). The data were analyzed using one-way ANOVA, followed by the Tukey's post-hoc test. \*\*\*\*,  $p < 0.0001$ . Scale bar,  $10 \mu\text{m}$ . **E.** Droplet formation of indicated purified proteins. Scale bar,

10  $\mu$ m. **F.** Transcription of *CTGF* in RFXANK-overexpressing HEK293FT cells treated with or without 1,6-Hex (n = 3/group). Data are presented as means  $\pm$  SD. Significance was tested using one-way ANOVA, followed by the Tukey's post-hoc test. \*\*p < 0.01, \*\*\*p < 0.001. **G.** Annexin V staining of RFXANK-overexpressing HEK293FT cells treated with or without 1,6-Hex. e.v., empty vector.

Related to **Figure 2.**

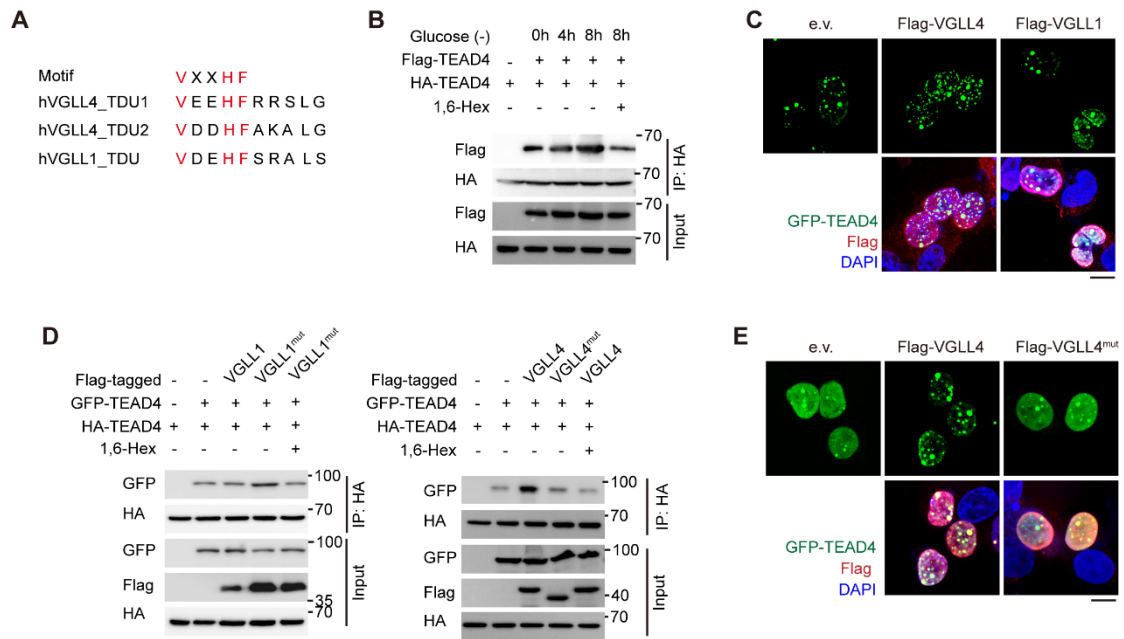

### Appendix Figure S3. Glucose Deprivation Promotes TEAD4 Oligomerization

**A.** Sequence alignment of TDU domains from VGLL1 and VGLL4. Key amino acid residues for binding to TEAD4 are shown in red. **B.** Results of Co-IP assay testing for TEAD4 oligomerization, specifically for the binding of HA-TEAD4 to Flag-TEAD4 in cells subjected to glucose limitation at indicated time points and with or without 1,6-Hex treatment. **C.** Fluorescence images of TEAD4 condensates in VGLL1- or VGLL4-overexpressing HEK293FT cells. Scale bar, 10  $\mu$ m. **D.** Co-IP analysis of TEAD4 oligomerization in HEK293FT cells transfected with VGLL1, VGLL4 or their mutants and with or without 1,6-Hex treatment. VGLL1<sup>mut</sup> is a construct in which TDU1 (amino acid residues 206–230) of VGLL4 was added to the N-terminal of wildtype VGLL1 to create a VGLL1 version with two TDUs. VGLL4<sup>mut</sup> is a construct in which TDU1 (amino acid residues 206–229) of VGLL4 was deleted to create a VGLL4 version with one TDU. **E.** Fluorescence images of TEAD4 condensates in HEK293FT cells transfected with VGLL4 or its mutant. Scale bar, 10  $\mu$ m.

Related to **Figure 3**.

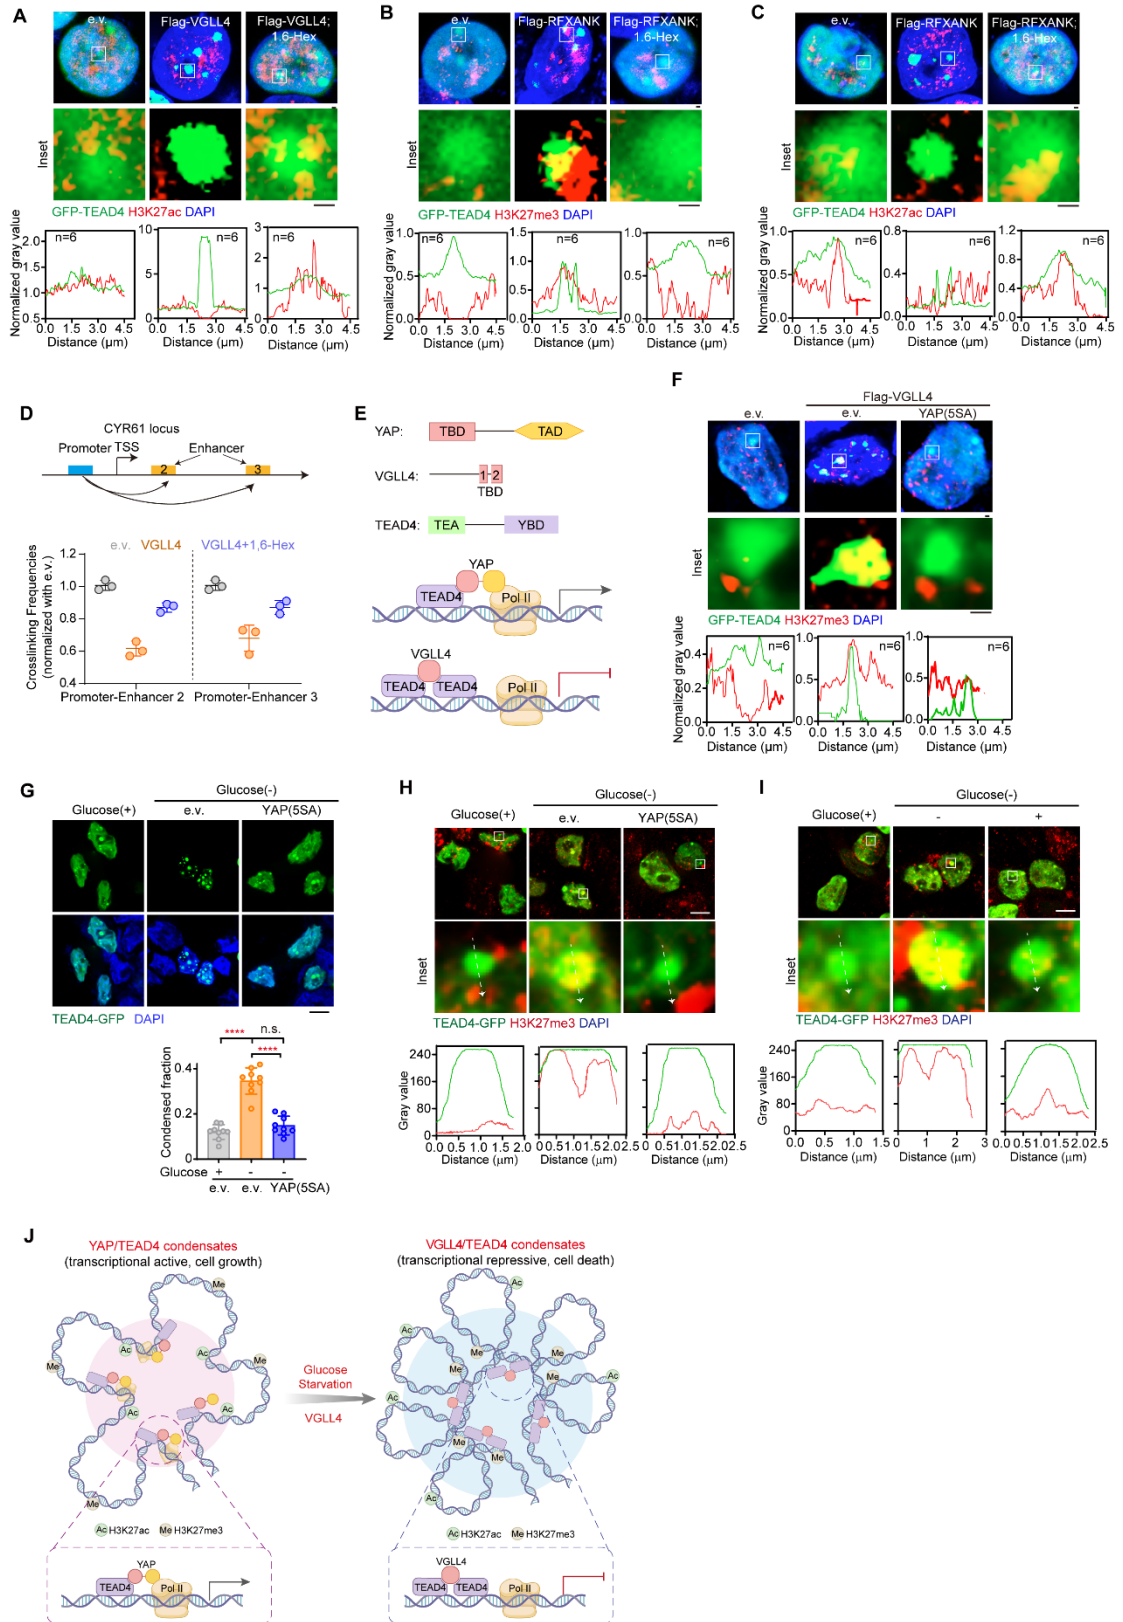

**Appendix Figure S4. TEAD4 Condensates Are Correlated with Transcriptional Repression**

**A.** Representative fluorescence images of GFP-TEAD4 and H3K27ac in VGLL4-overexpressing HEK293FT cells treated with or without 1,6-Hex (upper panel), and quantification of the fluorescence intensity levels of 6 cells with indicated color scheme (lower panel). Scale bar, 1  $\mu$ m. **B.** Representative images of GFP-TEAD4 and H3K27me3 in RFXANK-overexpressing HEK293FT cells treated with or without 1,6-Hex (upper panel), and quantification of the fluorescence intensity levels of 6 cells with indicated color scheme (lower panel). Scale bar, 1  $\mu$ m. **C.** Confocal microscopy images of GFP-TEAD4 and H3K27ac in RFXANK-transfected HEK293FT cells treated with or without 1,6-Hex(upper panel) and quantification of fluorescence intensity levels of 6 cells with indicated color scheme (lower panel). Scale bar, 1  $\mu$ m. **D.** 3C analysis to assess the distance of *CYR61* in VGLL4-overexpressing HEK293FT cells treated with or without 1,6-Hex. **E.** Domain architecture and binding models of YAP, VGLL4 and TEAD4. **F.** Immunofluorescence staining (upper and middle, representative images with zoom-in; lower, quantification of fluorescence intensity levels of 6 cells with indicated color scheme) of GFP-TEAD4 and H3K27me3 in VGLL4-expressed HEK293FT cells with or without YAP (5SA) co-transfection. Scale bar, 1  $\mu$ m. **G.** Fluorescence images of GFP-TEAD4 condensates in glucose starvation-treated HEK293FT cells with or without YAP(5SA) expression (top), and quantification of TEAD4 condensed fraction (bottom). The data were analyzed using one-way ANOVA, followed by the Tukey's post-hoc test. n.s., no significance; \*\*\*\*,  $p < 0.0001$ . Scale bar, 10  $\mu$ m. **H.** Fluorescence images of GFP-TEAD4 and H3K27me3 in glucose-deprived HEK293FT cells transfected with or without YAP(5SA). Scale bar, 10  $\mu$ m. **I.** Fluorescence images of GFP-TEAD4 and H3K27me3 in glucose-deprived HEK293FT cells with or without glucose re-supplement. Scale bar, 10  $\mu$ m. **J.** Cartoon presentation of the two forms (transcriptionally active or repressive) of TEAD4 LLPS driven by YAP or VGLL4.

Related to **Figure 4**.



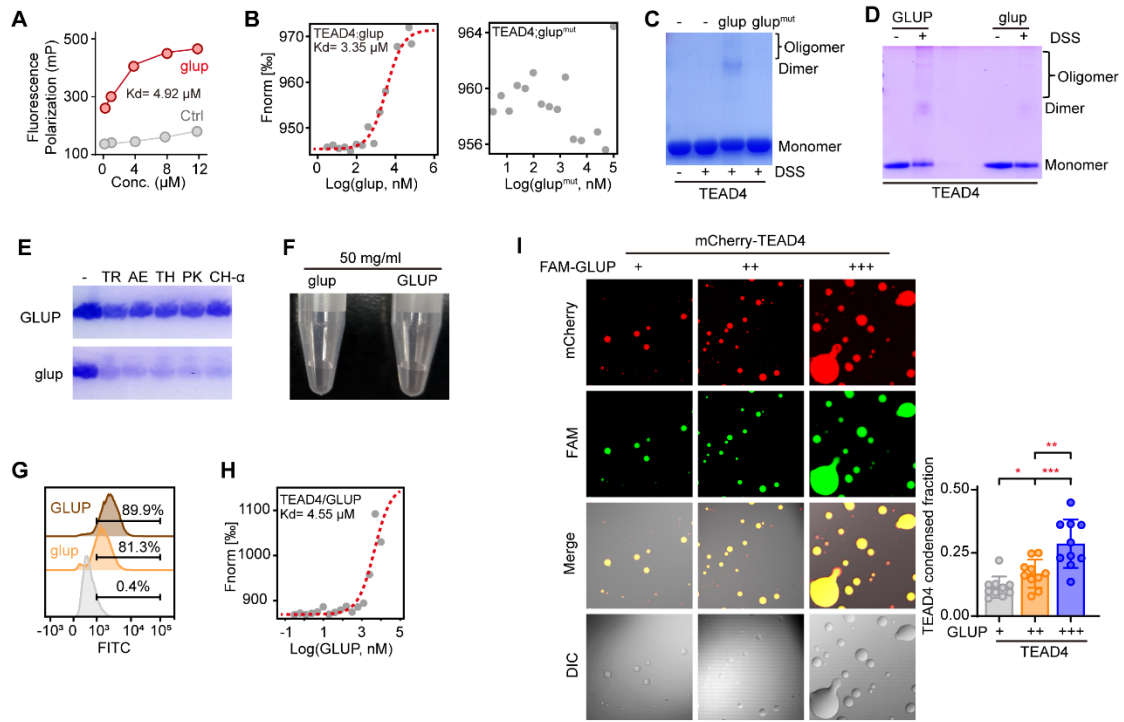

### Appendix Figure S5. Optimization of the Linker Peptide

**A.** Fluorescence polarization (FP) assay to detect the interaction of purified TEAD4 protein with FAM-labeled glup. mP, millipolarization (FP values). **B.** Microscale thermophoresis (MST) assay binding curves for the interaction of purified TEAD4 protein with glup or glup<sup>mut</sup>. Kd values are shown. glup<sup>mut</sup>, an interaction-dead control peptide with the sequence RRVCVAAAASLSLR. **C.** Crosslinking assay of TEAD4 oligomerization in the presence of glup or glup<sup>mut</sup> after DSS treatment. **D.** Crosslinking assay of TEAD4 oligomerization in the presence of glup or GLUP with or without DSS treatment. **E.** Gels assessing protein stability levels of glup and GLUP after they were treated with indicated proteases. TR, trypsin; AE, actinase E; TH, thermolysin; PK, proteinase K; CH- $\alpha$ , chymotrypsin- $\alpha$ . **F.** Photograph of vials of GLUP and glup peptides in ddH<sub>2</sub>O, for assessing their solubility levels. **G.** Flow cytometry analysis of cell permeability of FITC-labeled glup or GLUP in HEK293FT cells. **H.** MST assay showing the interaction of GLUP with TEAD4. **I.** Droplet formation of mCherry-TEAD4 with increasing doses of FAM-GLUP (left) and quantification of TEAD4 condensed fraction (right). GLUP (+), 20  $\mu$ M; GLUP (++), 40  $\mu$ M; GLUP (+++), 80  $\mu$ M. The data were analyzed using one-way ANOVA, followed by the Tukey's post-hoc test. \*,  $p < 0.05$ ; \*\*,  $p < 0.01$ .

$p < 0.01$ ; \*\*\*,  $p < 0.001$ . Scale bar, 10  $\mu\text{m}$ .

Related to **Figure 5**.

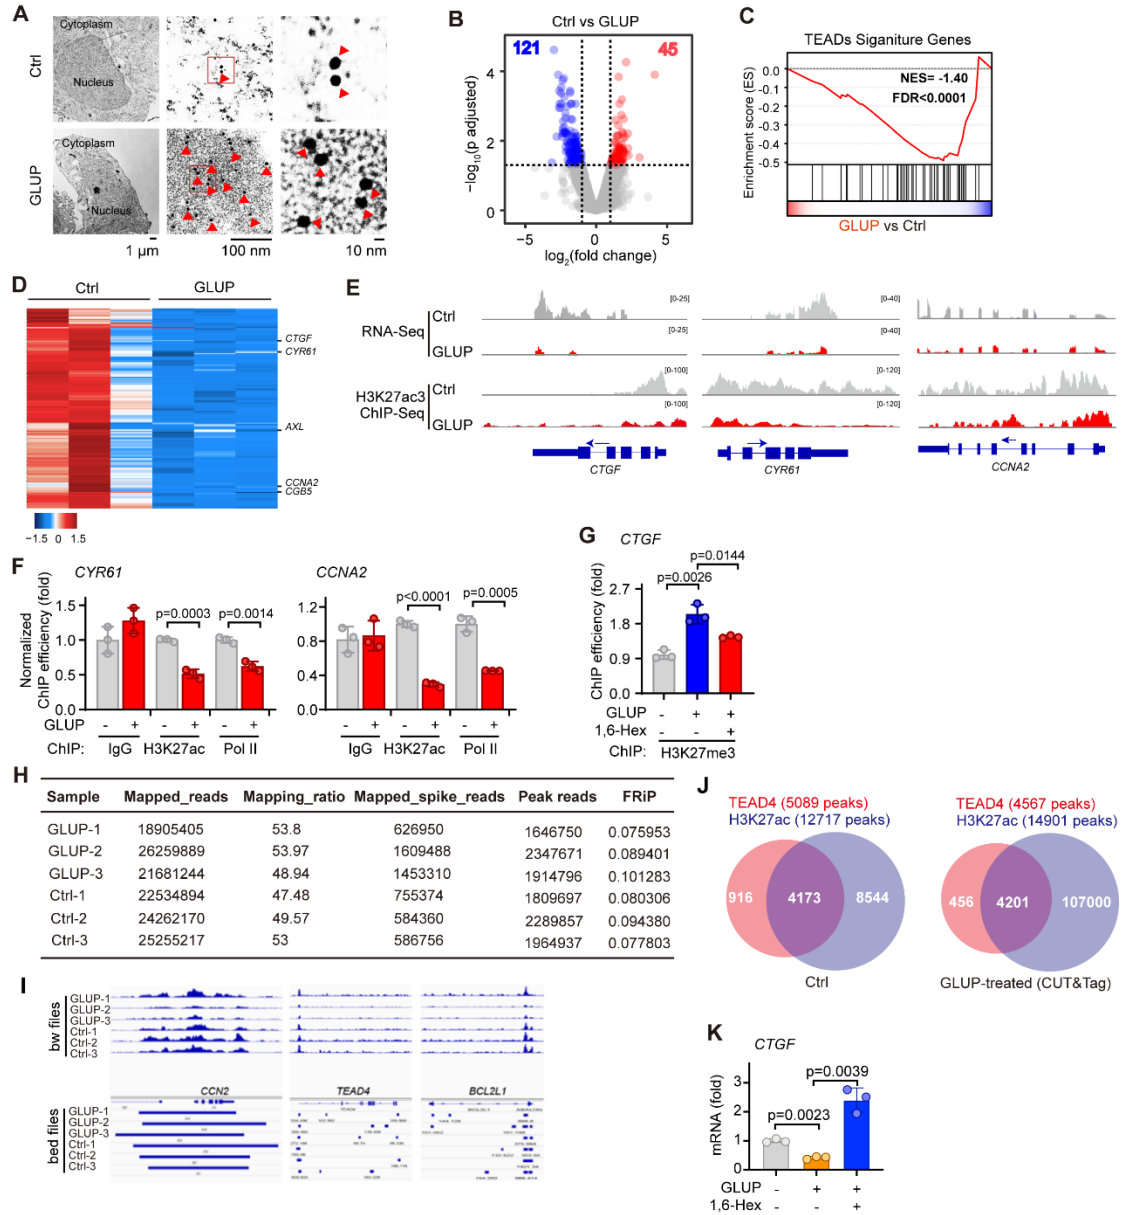

## Appendix Figure S6. Functional Assessment of GLUP

**A.** Colloidal gold IEM images depicting TEAD4 particles in GLUP-treated HGC-27 cells. The red arrows denote TEAD4 particles stained by colloidal-gold-conjugated primary antibody. Scale bars: 1  $\mu\text{m}$  for the left images, 100 nm for the middle ones, and 10 nm for the right ones. **B.** Volcano plot of altered genes in HGC-27 cells treated with GLUP (n = 3/group). Red dots represent up-regulated genes while blue ones represent down-regulated genes. **C.** Gene set enrichment analysis (GSEA) of TEAD signature genes in GLUP-treated HGC-27 cells. Normalized enrichment score (NES) and FDR are shown. **D.** Heatmap for down-regulated genes in control or GLUP-treated HGC-27

cells (n = 3). **E.** Integrative Genomics Viewer (IGV) snapshot depicting RNA-Seq and ChIP-Seq signals of the indicated genes in GLUP-treated cells. Signals are plotted on a normalized read per million (RPM) bases. **F.** Enrichment of H3K27ac3 and polymerase II (Pol II) on the promoters of *CYR61* and *CCNA2* in GLUP-treated cells as determined by performing chromatin immunoprecipitation-quantitative PCR (ChIP-qPCR) (n = 3/group). Data are presented as means  $\pm$  SD. Significance was tested using one-way ANOVA, followed by the Tukey's post-hoc test. \*\*p < 0.01, \*\*\*p < 0.001. \*\*\*\*p < 0.0001. **G.** ChIP-qPCR-measured enrichment of H3K27me3 on *CTGF* promoter in GLUP-treated cells after they were treated with 1,6-Hex (n = 3/group). Data are presented as means  $\pm$  SD. Significance was tested using one-way ANOVA, followed by the Tukey's post-hoc test. \*p < 0.05, \*\*p < 0.01. **H.** FRiP values for TEAD4 ChIP-Seq assay using CUT&Tag strategy for triplicates with control or GLUP treatment. **I.** IGV showing the single peak for *CTGF*, *TEAD4* and *BCL2L1* in TEAD4 ChIP-Seq assay using CUT&Tag strategy for triplicates with control or GLUP treatment. **J.** Analysis of the binding of H3K27ac to the TEAD4-specific motifs upon GLUP treatment. **K.** mRNA levels of *CTGF* in GLUP-treated cells with or without 1,6-Hex (n = 3/group). Data are presented as means  $\pm$  SD. Significance was tested using one-way ANOVA, followed by the Tukey's post-hoc test. \*\*p < 0.01.

Related to **Figure 6**.

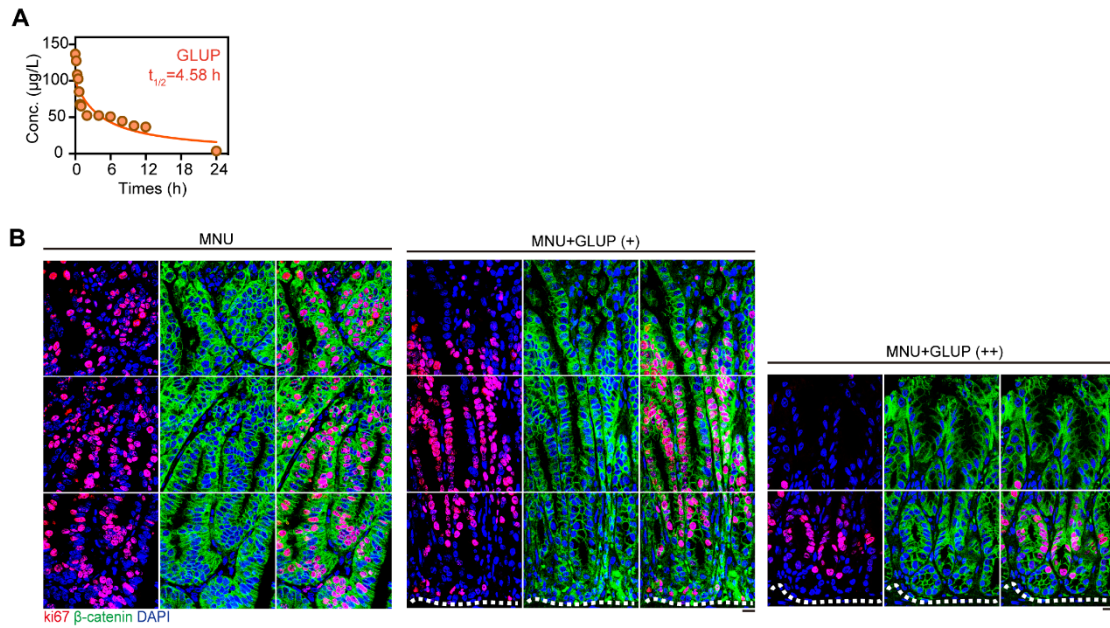

**Appendix Figure S7. Evaluation of GLUP *in vivo***

**A.** Half-lives ( $t_{1/2}$ ) of GLUP in plasma of mice. GLUP: 10 mg/kg per mice. **B.** Immunofluorescence images of  $\beta$ -catenin and Ki67 in MNU-generated GC tumors from GLUP-treated mice. Scale bar, 10  $\mu\text{m}$ .

Related to **Figure 7**.

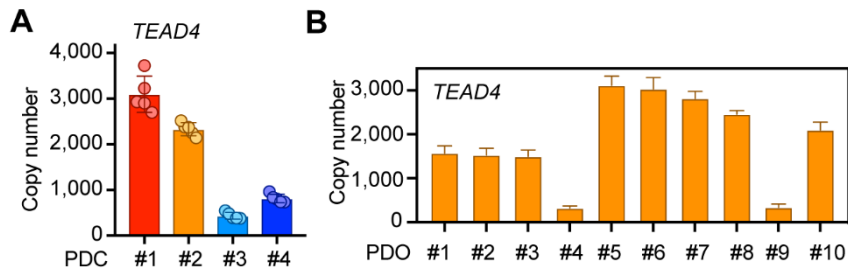

**C**

| Inde                           | Saline (10 ml/kg) | GLUP (1 mg/kg) | GLUP (10 mg/kg) |
|--------------------------------|-------------------|----------------|-----------------|
| White blood cell ( $10^9/L$ )  | 6.9±1.1           | 6.0±1.2        | 4.7±0.9*        |
| Ret blood cell ( $10^{12}/L$ ) | 11.0±0.3          | 9.3±0.7**      | 9.4±0.3***      |
| Hemoglobin                     | 169.0±5.9         | 142.5±8.9**    | 141.0±5.1***    |
| Platelet ( $10^9/L$ )          | 311.3±24.1        | 946.5±147.3**  | 997.5±101.7**   |
| Lymphocytes ( $10^9/L$ )       | 6.5±1.0           | 4.9±1.4        | 3.8±0.7**       |
| Monocytes ( $10^9/L$ )         | 0.1±0.1           | 0.2±0.1**      | 0.2±0.4**       |
| Neutrophil ( $10^9/L$ )        | 0.21±0.1          | 0.5±0.2*       | 0.6±0.2***      |
| Albumin (g/L)                  | 23.1±4.41         | 24.1±2.1       | 23.8±1.9        |
| Glucose (mmol/L)               | 8.71±0.9          | 11.9±0.7**     | 11.2±1.1**      |
| Creatinine (umol/L)            | 17.1±2.5          | 15.4±1.4       | 14.2±1.6        |
| Urea (mmol/L)                  | 8.0±0.8           | 7.3±1.0        | 7.5±1.0         |
| AST (U/L)                      | 97.0±3.5          | 82.3±10.1      | 76.5±12.9*      |
| ALT (U/L)                      | 34.5±1.7          | 36.0±7.4       | 30.0±3.6        |

**Appendix Figure S8. Evaluation of the GLUP Therapy**

**A.** Copy numbers of *TEAD4* transcripts in 4 PDCs. Data are presented as means ± SD. **B.** Copy numbers of *TEAD4* transcripts in 10 PDOs. Data are presented as means ± SD. **C.** Biochemical analysis of blood from mice treated with indicated doses of GLUP. Data are presented as means ± SD. \*p < 0.05, \*\*p < 0.01, \*\*\*p < 0.001.

Related to **Figure 8**.

**Appendix Table S1. The Sequence of Indicated Primers**

| Gene name (human)                                   | Forward (5'-3')                                           | Reverse (5'-3')                                          |
|-----------------------------------------------------|-----------------------------------------------------------|----------------------------------------------------------|
| <i>CTGF</i>                                         | AAAAGTGCATCCGTA<br>CTC<br>CCA                             | CCGTCGGTACATA<br>CTC<br>CACAG                            |
| <i>CYR61</i>                                        | GGTCAAAGTTACCG<br>GGC<br>AGT                              | GGAGGCATCGAAT<br>CCC<br>AGC                              |
| <i>CTCF</i>                                         | GAAGCCTCCAAAG<br>CCAA<br>C                                | GCACTTGTGTGGT<br>CTC<br>TCATC                            |
| <i>ARID3B</i>                                       | GATGCCAGAGAGA<br>AGCA<br>G                                | GTCTCCCAGCTGT<br>GGC                                     |
| <i>YY1</i>                                          | CAGATTCTCATCC<br>CGGT<br>G                                | CCGCTGAGGTAAC<br>TCT<br>TCTTG                            |
| <i>LDOC1</i>                                        | CTCATGGAACAG<br>CTGCG                                     | CATGGCGTCGTT<br>GCG                                      |
| <i>EMSY</i>                                         | CTGGAGCTGCAAC<br>CTAT<br>G                                | CAATCACGTTGGG<br>CTT<br>G                                |
| <i>RFXANK</i>                                       | CTGCCTCAGAACT<br>TGGG                                     | CATCCGGTTCAGG<br>ATT<br>C                                |
| <i>VGLL4</i>                                        | AACTGCAACCTCT<br>CGCA<br>CTG                              | GAGTGGGTGTCG<br>CTGT<br>TGAA                             |
| <i>ACTB</i>                                         | ATCATGAAGTGTG<br>ACGT<br>GGA                              | CTCAGGAGGAGCA<br>ATG<br>ATCT                             |
|                                                     |                                                           |                                                          |
| 3C                                                  |                                                           |                                                          |
| <i>CYR61</i> locus:                                 |                                                           |                                                          |
| Anchor primer: 5'-<br>TGGGGTTCTACAGTC<br>GTAAAAG-3' | Enhancer 2 primer: 5'-<br>AAAGAGAGCAGAGATGA<br>GAAACAC-3' | Enhancer 3 primer: 5'-<br>GGGAGATGCCTTTGCT<br>TTG-3'     |
| <i>MYC</i> locus:                                   |                                                           |                                                          |
| Anchor primer: 5'-<br>CGGTAATGGCAAACG<br>TGAA-3'    | Enhancer 1 primer: 5'-<br>GGGGAGTACATTAGAGG<br>AACAAA-3'  | Enhancer 4 primer: 5'-<br>GTCCTATCAGCCAGAA<br>CTTAGCC-3' |
